# Supplementary material
Source: PubMed Central journal article supplement (PMC4665739)
Supplement: chest_148_6_1477_ds01.pdf [file chest_148_6_1477_ds01.pdf]

# Clinical Characteristics and Outcomes Are Similar in ARDS Diagnosed by Oxygen Saturation/FIO<sub>2</sub> Ratio Compared With Pao<sub>2</sub>/FIO<sub>2</sub> Ratio

*Wei Chen, MD; David R. Janz, MD, MSCI; Ciara M. Shaver, MD, PhD; Gordon R. Bernard, MD; Julie A. Bastarache, MD; and Lorraine B. Ware, MD*

CHEST 2015; 148(6):1477-1483

## **e-Appendix 1.**

### **A subgroup analysis of patients who did not have shock on the day of ARDS diagnosis**

Among 362 patients enrolled in the study, 191 (52.8%) did not have shock on the day of ARDS diagnosis. Of 191 patients, 113 (60%) were diagnosed by PF ratio and 78 (40%) were diagnosed by SF ratio. Further analyzing the clinical characteristics and outcomes between the two subgroups, there were no significant differences in terms of underlying diseases, gender, hospital stays, ICU stays, in-hospital mortality. In this subgroup analysis, patients diagnosed by PF ratio (n=113) were more likely to be diagnosed with ARDS on the first day of ICU admission compared to those diagnosed by SF ratio (96% vs. 78%, p=0.001). The overall results of this subgroup analysis are very similar to the findings in the entire group.

*Online supplements are not copyedited prior to posting.*

**e-Table 1.** A subgroup analysis of patients who did not have shock on the day of ARDS diagnosis – comparison of clinical characteristics between PF and SF

|                                                 | Diagnosed by PF<br>ratio<br>(n=113) | Diagnosed by SF<br>ratio<br>(n=78) | <i>p-value</i> |
|-------------------------------------------------|-------------------------------------|------------------------------------|----------------|
| Age (years)                                     | 53 ± 16                             | 52 ± 16                            | 0.488          |
| APACHE II                                       | 28 ± 8                              | 24 ± 8                             | <0.001         |
| Modified APACHE II without pH, PaO <sub>2</sub> | 25 ± 7                              | 24 ± 8                             | 0.470          |
| Male                                            | 53 (47%)                            | 45 (58%)                           | 0.185          |
| Caucasian                                       | 98 (87%)                            | 64 (82%)                           | 0.579          |
| Current smoker                                  | 38 (34%)                            | 24 (31%)                           | 0.754          |
| Diabetes                                        | 38 (34%)                            | 23 (30%)                           | 0.636          |
| Alcohol                                         | 15 (13%)                            | 16 (21%)                           | 0.231          |
| Chronic liver disease                           | 12 (11%)                            | 11 (14%)                           | 0.503          |
| Chronic kidney disease                          | 26 (23%)                            | 13 (17%)                           | 0.362          |
| On dialysis                                     | 2 (1.8%)                            | 5 (6.4%)                           | 0.124          |
| ARDS risk factor                                |                                     |                                    | 0.300          |
| Sepsis                                          | 26 (23%)                            | 27 (35%)                           |                |
| Pneumonia                                       | 47 (42%)                            | 22 (28%)                           |                |
| Aspiration                                      | 30 (27%)                            | 23 (30%)                           |                |
| Other                                           | 10 (8%)                             | 6 (7%)                             |                |

*Online supplements are not copyedited prior to posting.*

**e-Table 2.** A subgroup analysis of patients who did not have shock on the day of ARDS diagnosis – comparison of course and outcomes between PF and SF

|                                                      | Diagnosed<br>by PF<br>ratio<br>(n=113) | Diagnosed<br>By SF<br>ratio<br>(n=78) | <i>p-value</i> |
|------------------------------------------------------|----------------------------------------|---------------------------------------|----------------|
| Ventilation Mode on the Day of ARDS Diagnosis        |                                        |                                       | 1.000          |
| Mech. Ventilator                                     | 95 (84%)                               | 65 (83%)                              |                |
| NIPPV                                                | 18 (16%)                               | 13 (17%)                              |                |
| Ventilation mode on the 4 <sup>th</sup> day of study |                                        |                                       | 1.000          |
| Mech. Ventilator                                     | 99 (88%)                               | 68 (87%)                              |                |
| NIPPV                                                | 14 (12%)                               | 10 (13%)                              |                |
| Number of Study Days with ARDS                       |                                        |                                       | <0.001         |
| 1-day                                                | 4 (4%)                                 | 11 (14%)                              |                |
| 2-day                                                | 10 (9%)                                | 13 (17%)                              |                |
| 3-day                                                | 13 (11%)                               | 19 (24%)                              |                |
| 4-day                                                | 86 (76%)                               | 35 (45%)                              |                |
| Timing of Diagnosis of ARDS                          |                                        |                                       | 0.001          |
| First day                                            | 109 (96.5%)                            | 61 (78.2%)                            |                |
| Second day                                           | 1 (0.9%)                               | 8 (10.3%)                             |                |
| Third day                                            | 1 (0.9%)                               | 5 (6.4%)                              |                |
| Fourth day                                           | 2 (1.8%)                               | 4 (5.1%)                              |                |
| Length of ICU stay                                   | 10 ± 8                                 | 9 ± 8                                 | 0.263          |
| Length of Ventilation                                | 8 ± 7                                  | 7 ± 8                                 | 0.251          |
| Ventilator free days                                 | 13 ± 10                                | 15 ± 10                               | 0.160          |
| Length of hospital<br>stay                           | 17 ± 13                                | 17 ± 13                               | 0.710          |
| Hospital Mortality                                   | 35 (31%)                               | 25 (32%)                              | 0.875          |

*Online supplements are not copyedited prior to posting.*
